# Supplementary material for: Linc00152 suppresses apoptosis and promotes migration by sponging miR-4767 in vascular endothelial cells
Source: PubMed Central journal article supplement (PMC5689590; doi:10.18632/oncotarget.18777), 2017-06-28
Supplement: oncotarget-08-85014-s001.pdf [file oncotarget-08-85014-s001.pdf]

# Linc00152 suppresses apoptosis and promotes migration by sponging miR-4767 in vascular endothelial cells

## SUPPLEMENTARY MATERIALS

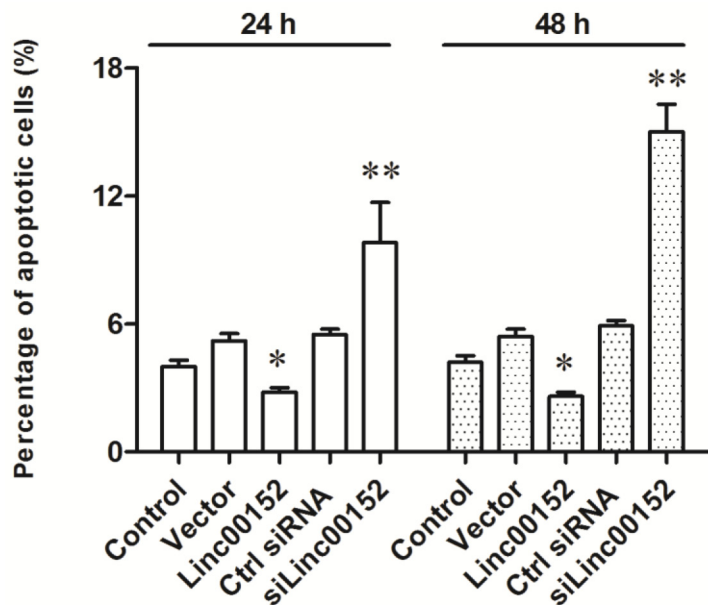

**Supplementary Figure 1: Linc00152 suppressed apoptosis in HUVECs under normal condition.** HUVECs were transfected with 1.0 µg/mL pcDNA3.1-linc00152 or 40 nM Linc00152 siRNA. At 24 h and 48 h, cell apoptosis was checked by TUNEL assay.

**Target:** NR\_024204.1  
 length: 828  
**MiRNA:** NR\_039924.1  
 length: 23  
  
 mfe: -32.6 kcal/mol  
 p-value: 1.000000e+00  
  
**Position: 113**  
 target 5' A U CCGU C 3'  
           GCCGU GCC GAGC GCCUGU  
           CGCCG CGG CUCG CGGGCG  
 miRNA 3' C C UC C 5'

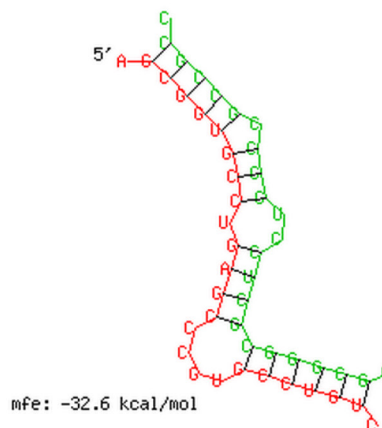

**Supplementary Figure 2: The binding details of linc00152 and miR-4767 predicted by RNAHybrid.** Mfe: molecular binding free energy.

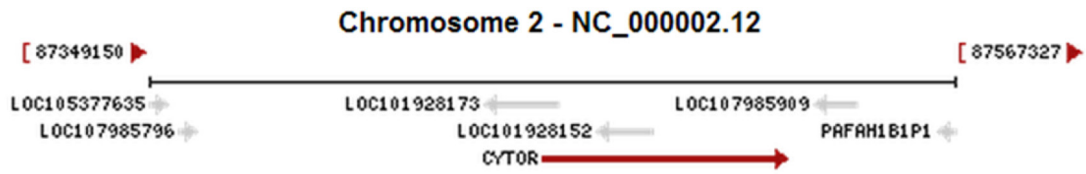

Supplementary Figure 3: The location of linc00152 gene (also CYTOR) on Chromosome2.
